# Supplementary material for: The Canadian Methotrexate and Etanercept Outcome Study: a randomised trial of discontinuing versus continuing methotrexate after 6 months of etanercept and methotrexate therapy in rheumatoid arthritis
Source: PubMed Central journal article supplement — Ann Rheum Dis. 2013 Aug 26;73(12):2144–51. doi: 10.1136/annrheumdis-2013-203684 (PMC4251190; doi:10.1136/annrheumdis-2013-203684), 2013-08-26
Supplement: annrheumdis-2013-203684-s2.pdf [file annrheumdis-2013-203684-s2.pdf]

**Supplementary Table 1. Demographic and Disease Characteristics for Non-randomized Patients**

| <b>Characteristic</b>                                                                     | <b>Baseline (N = 53)</b> |
|-------------------------------------------------------------------------------------------|--------------------------|
| Female, n (%)                                                                             | 41.0 (77.4)              |
| White or Caucasian, n (%)                                                                 | 47.0 (88.7)              |
| Mean age, years (SD)                                                                      | 56.2 (13.4)              |
| Reimbursement type, n (%)                                                                 |                          |
| Private                                                                                   | 23.0 (43.4)              |
| Public                                                                                    | 16.0 (30.2)              |
| Combination/Other                                                                         | 14.0 (26.4)              |
| Mean duration of RA, years (SD) <sup>a</sup>                                              | 7.8 (7.6)                |
| Rheumatoid factor positive, n (%)                                                         | 35.0 (66.0)              |
| Mean CRP, mg/L (SD)                                                                       | 10.5 (16.2)              |
| Mean ESR, mm/hr (SD)                                                                      | 24.8 (21.4)              |
| Mean Tender 28 joint count, (SD)                                                          | 13.0 (7.9)               |
| Mean Swollen 28 joint count, (SD)                                                         | 10.5 (5.6)               |
| Mean DAS28, (SD)                                                                          | 5.5 (1.1)                |
| Mean HAQ, (SD)                                                                            | 1.5 (0.7)                |
| Concomitant DMARDs <sup>b</sup>                                                           |                          |
| Hydroxychloroquine, n(%)                                                                  | 4 (7.5)                  |
| Sulfasalazine, n(%)                                                                       | 1 (1.9)                  |
| Prior Medication                                                                          |                          |
| Mean duration of MTX use prior to study start, years (SD) <sup>c</sup>                    | 4.6 (5.5)                |
| Mean average weekly dose of MTX in 12 weeks prior to study start, mg/wk (SD) <sup>d</sup> | 20.1 (4.7)               |
| Subcutaneous MTX 4 weeks prior to study start, n (%)                                      | 25.0 (47.2)              |
| No. of other prior DMARDs, median [min, max]                                              | 2 [0, 4]                 |
| Patients on ≥ 2 DMARDs, n (%)                                                             | 32.0 (60.4)              |
| Corticosteroids ever, n (%)                                                               | 43.0 (81.1)              |
| Prednisone or equivalent (intra-articular), n (%)                                         | 16.0 (30.2)              |
| Prednisone or equivalent (oral), n (%)                                                    | 29.0 (54.7)              |
| Other, n (%) <sup>e</sup>                                                                 | 15.0 (28.3)              |

<sup>a</sup>Calculated based on enrollment date; <sup>b</sup>None of the non-randomized patients were taking leflunomide, chloroquine gold or rituximab; terms were coded using WHO Drug version 2012 Q4; <sup>c</sup>Calculated from date of first MTX dose to enrollment date;

<sup>d</sup>Average is calculated per subject first, then averaged across all subjects in the group; <sup>e</sup>Includes betamethasone, methylprednisolone, methylprednisolone acetate, methylprednisolone sodium succinate, triamcinolone, triamcinolone acetate;

<sup>f</sup>Study excluded patients previously on etanercept, infliximab or adalimumab but included patients previously on anakinra, abatacept, rituximab and other biologics; CRP = C-reactive protein; DAS28 = disease activity score 28; DMARDs = disease-modifying antirheumatic drugs; ESR = erythrocyte sedimentation rate; MTX = methotrexate; NSAIDs = nonsteroidal anti-inflammatory drugs; RA = rheumatoid arthritis; SD = standard deviation
